# Supplementary material
Source: publisher site journal article supplement (https://www.spandidos-publications.com/4250/downloadSupplementary)
Supplement: Supplementary file 1 [file downloadSupplementary]

## Sheet: ccRCC vs rest (Table SI A)
Table SI. Limma analyses for differentially expressed transcripts.
ENSG	ENSGv	gene_version	SYMBOL	gene_biotype	chr	start	end	strand	ENTREZID	ccRCC...chRCC	ccRCC...pRCC_e1	ccRCC...pRCC_e2	F	P.Value	adj.P.Val
ENSG00000102755	ENSG00000102755.9	11	FLT1	protein_coding	13	28300344	28495145	-	2321	2.24774	4.63529	3.53747	1442.74	0	0
ENSG00000107159	ENSG00000107159.11	12	CA9	protein_coding	9	35673856	35681159	+	768	7.91626	5.78537	6.42179	1711.63	0	0
ENSG00000112715	ENSG00000112715.19	21	VEGFA	protein_coding	6	43770184	43786487	+	7422	2.45769	5.10815	3.7654	1787.65	0	0
ENSG00000113739	ENSG00000113739.9	10	STC2	protein_coding	5	173314713	173329503	-	8614	3.29513	4.80255	3.30009	1469.89	0	0
ENSG00000129521	ENSG00000129521.12	13	EGLN3	protein_coding	14	33924231	34462774	-	112399	5.08372	3.62808	4.3515	1513.11	0	0
ENSG00000185633	ENSG00000185633.9	10	NDUFA4L2	protein_coding	12	57234903	57240715	-	56901	5.74942	8.00547	6.85103	3214.68	0	0
ENSG00000167772	ENSG00000167772.10	11	ANGPTL4	protein_coding	19	8363289	8374373	+	51129	7.04316	5.85616	5.33234	1397.91	3.95005e-320	1.31730993920891e-317
ENSG00000154269	ENSG00000154269.13	14	ENPP3	protein_coding	6	131628442	131747418	+	5169	7.01661	3.85052	3.89868	1291.04	0	5.18511e-306
ENSG00000171208	ENSG00000171208.8	9	NETO2	protein_coding	16	47077703	47143997	-	81831	2.03514	3.69741	2.76491	1251.1	6.81184e-304	1.86152e-301
ENSG00000117266	ENSG00000117266.14	15	CDK18	protein_coding	1	205504595	205532793	+	5129	3.78489	2.59829	2.28168	1236.3	3.59331e-302	9.42692e-300
ENSG00000184661	ENSG00000184661.12	13	CDCA2	protein_coding	8	25458997	25507920	+	157313	2.99338	3.31532	2.83484	1233.45	7.76113e-302	2.00932e-299
ENSG00000164283	ENSG00000164283.11	12	ESM1	protein_coding	5	54977864	55022671	-	11082	2.47945	5.32871	3.41515	1172.4	1.56287e-294	3.79643e-292
ENSG00000091879	ENSG00000091879.12	13	ANGPT2	protein_coding	8	6499651	6563409	-	285	2.31502	4.35113	3.43954	1145.61	3.14581e-291	7.282e-289
ENSG00000140945	ENSG00000140945.14	16	CDH13	protein_coding	16	82626803	83800640	+	1012	2.10833	3.63129	2.89934	1065.14	6.45347e-281	1.25721e-278
ENSG00000261371	ENSG00000261371.4	5	PECAM1	protein_coding	17	64319415	64413776	-	5175	2.03461	3.59555	2.74396	1053.24	2.43584e-279	4.60843e-277
ENSG00000143248	ENSG00000143248.11	12	RGS5	protein_coding	1	163111121	163321791	-	8490	2.41709	5.34745	3.97368	1012.76	7.26386e-274	1.2876e-271
ENSG00000159167	ENSG00000159167.10	11	STC1	protein_coding	8	23841915	23854807	-	6781	2.79657	4.51353	4.04288	1006.33	5.57653e-273	9.6249e-271
ENSG00000135245	ENSG00000135245.9	9	HILPDA	protein_coding	7	128455849	128458418	+	29923	4.5722	3.87187	4.16622	994.419	2.50426e-271	4.24774e-269
ENSG00000186918	ENSG00000186918.12	13	ZNF395	protein_coding	8	28345585	28402701	-	55893	2.41253	2.39096	2.61369	983.572	8.25455e-270	1.37641e-267
ENSG00000115112	ENSG00000115112.7	7	TFCP2L1	protein_coding	2	121216587	121285207	-	29842	-6.32901	-2.41624	-2.1751	976.629	7.85546e-269	1.25662e-266
ENSG00000187730	ENSG00000187730.7	8	GABRD	protein_coding	1	2019298	2030758	+	2563	2.21704	3.64163	3.28203	974.545	1.5488e-268	2.41859e-266
ENSG00000162654	ENSG00000162654.8	8	GBP4	protein_coding	1	89181148	89198932	-	115361	2.47558	3.53645	2.7623	952.004	2.5716e-265	3.83324e-263
ENSG00000148346	ENSG00000148346.10	11	LCN2	protein_coding	9	128149071	128153455	+	3934	-3.31581	-6.7505	-3.50006	939.283	1.79397e-263	2.59545e-261
ENSG00000164342	ENSG00000164342.11	12	TLR3	protein_coding	4	186069152	186088069	+	7098	3.19436	2.13234	2.35913	930.298	3.69586e-262	5.15743e-260
ENSG00000134716	ENSG00000134716.8	9	CYP2J2	protein_coding	1	59893308	59926790	-	1573	6.10976	5.03763	4.72051	916.629	3.85046e-260	5.18916e-258
ENSG00000161267	ENSG00000161267.10	11	BDH1	protein_coding	3	197509783	197573323	-	622	-3.40515	-2.1727	-2.39648	873.923	1.10361e-253	1.32406e-251
ENSG00000134954	ENSG00000134954.13	14	ETS1	protein_coding	11	128458761	128587558	-	2113	2.40223	2.72702	2.42388	860.976	1.1167e-251	1.25556e-249
ENSG00000082684	ENSG00000082684.13	14	SEMA5B	protein_coding	3	122909193	123028605	-	54437	4.58823	2.99822	3.68461	858.601	2.61974e-251	2.9122e-249
ENSG00000140479	ENSG00000140479.15	16	PCSK6	protein_coding	15	101297142	101525202	-	5046	3.2862	3.65167	3.25497	841.567	1.25149e-248	1.32389e-246
ENSG00000050767	ENSG00000050767.14	15	COL23A1	protein_coding	5	178237618	178590555	-	91522	6.42733	2.44065	2.9514	827.599	2.11432e-246	2.12252e-244
ENSG00000133574	ENSG00000133574.8	9	GIMAP4	protein_coding	7	150567277	150573955	+	55303	2.10596	2.8257	2.21544	827.435	2.24581e-246	2.24307e-244
ENSG00000086205	ENSG00000086205.15	16	FOLH1	protein_coding	11	49146635	49208670	-	2346|219595	2.32461	3.40389	2.44997	812.224	6.45887e-244	6.10984e-242
ENSG00000185585	ENSG00000185585.18	19	OLFML2A	protein_coding	9	124777158	124814885	+	169611	2.25203	3.76772	3.55509	807.781	3.42658e-243	3.16532e-241
ENSG00000181577	ENSG00000181577.14	15	C6orf223	protein_coding	6	44000580	44005958	+	221416	2.24008	4.47774	4.08839	800.365	5.63795e-242	5.06541e-240
ENSG00000112214	ENSG00000112214.9	10	FHL5	protein_coding	6	96562548	96616636	+	9457	2.38419	3.39614	2.79317	792.942	9.48455e-241	8.40622e-239
ENSG00000142319	ENSG00000142319.17	17	SLC6A3	protein_coding	5	1392790	1445430	-	6531	5.70046	5.70511	5.55773	766.163	2.96239e-236	2.3791e-234
ENSG00000171992	ENSG00000171992.11	12	SYNPO	protein_coding	5	150601080	150659220	+	11346	2.1894	3.40242	2.36701	755.029	2.36968e-234	1.81424e-232
ENSG00000113532	ENSG00000113532.11	12	ST8SIA4	protein_coding	5	100806935	100903266	-	7903	2.65859	2.71969	2.35649	716.802	1.1727e-227	8.03971e-226
ENSG00000181104	ENSG00000181104.6	6	F2R	protein_coding	5	76716043	76735781	+	2149	2.29682	3.04201	2.2736	714.821	2.65005e-227	1.79183e-225
ENSG00000161638	ENSG00000161638.9	10	ITGA5	protein_coding	12	54395261	54419460	-	3678	2.11515	2.65274	2.24377	703.281	3.15775e-225	2.04381e-223
ENSG00000176387	ENSG00000176387.6	6	HSD11B2	protein_coding	16	67430652	67437553	+	3291	-5.53076	2.37881	2.08894	701.674	6.17063e-225	3.95483e-223
ENSG00000175538	ENSG00000175538.9	10	KCNE3	protein_coding	11	74454841	74467729	-	10008	2.61739	2.47241	2.19593	699.11	1.80179e-224	1.14362e-222
ENSG00000163083	ENSG00000163083.5	5	INHBB	protein_coding	2	120346143	120351808	+	3625	2.27992	3.73607	3.12014	668.918	6.76417e-219	3.90299e-217
ENSG00000135218	ENSG00000135218.16	17	CD36	protein_coding	7	80369575	80679277	+	948	2.00143	3.83503	2.92686	665.197	3.38442e-218	1.93581e-216
ENSG00000100024	ENSG00000100024.13	14	UPB1	protein_coding	22	24494107	24528390	+	51733	3.202	2.89096	2.21795	661.098	2.01019e-217	1.11415e-215
ENSG00000144476	ENSG00000144476.5	5	ACKR3	protein_coding	2	236567787	236582358	+	57007	2.57696	2.91263	2.82214	645.324	2.05293e-214	1.07429e-212
ENSG00000163909	ENSG00000163909.7	7	HEYL	protein_coding	1	39624153	39639945	-	26508	2.03087	3.33788	2.43197	635.555	1.59264e-212	8.0351e-211
ENSG00000117228	ENSG00000117228.9	9	GBP1	protein_coding	1	89052319	89065360	-	2633	3.1573	2.55143	2.03421	634.057	3.11728e-212	1.55674e-210
ENSG00000088899	ENSG00000088899.13	14	LZTS3	protein_coding	20	3162617	3173592	-	9762	-2.36936	-2.27484	-2.05815	630.583	1.48522e-211	7.32409e-210
ENSG00000183722	ENSG00000183722.7	7	LHFP	protein_coding	13	39342892	39603528	-	10186	2.10062	2.91731	2.04727	605.817	1.2099e-206	5.39819e-205

## Sheet: p1RCC vs rest (Table SI B)
ENSG	ENSGv	gene_version	SYMBOL	gene_biotype	chr	start	end	strand	ENTREZID	pRCC_e1...ccRCC	pRCC_e1...chRCC	pRCC_e1...pRCC_e2
ENSG00000148346	ENSG00000148346.10	11	LCN2	protein_coding	9	128149071	128153455	+	3934	6.7505	3.43469	3.25044	F	P.Value	adj.P.Val
ENSG00000125872	ENSG00000125872.7	7	LRRN4	protein_coding	20	6040778	6054049	-	164312	4.45085	5.99064	2.97823	939.283	1.79397e-263	2.59545e-261
ENSG00000167779	ENSG00000167779.6	7	IGFBP6	protein_coding	12	53097436	53102345	+	3489	3.43228	5.98558	2.35106	780.499	1.12546e-238	9.50409e-237
ENSG00000136155	ENSG00000136155.15	16	SCEL	protein_coding	13	77535674	77645263	+	8796	3.71087	3.79231	2.47019	646.102	1.45469e-214	7.67361e-213
ENSG00000165215	ENSG00000165215.6	6	CLDN3	protein_coding	7	73768997	73770270	-	1365	3.9309	5.24461	2.18031	570.896	1.76991e-199	6.82839e-198
ENSG00000132821	ENSG00000132821.10	11	VSTM2L	protein_coding	20	37903104	37945350	+	128434	4.31231	4.03649	3.66063	522.815	4.12631e-189	1.29695e-187
ENSG00000204385	ENSG00000204385.9	10	SLC44A4	protein_coding	6	31863192	31879046	-	80736	3.97015	5.46931	4.42357	439.038	1.89542e-169	4.27687e-168
ENSG00000144214	ENSG00000144214.8	9	LYG1	protein_coding	2	99284238	99304742	-	129530	2.11786	6.26162	2.60794	407.475	1.96521e-161	3.77612e-160
ENSG00000158747	ENSG00000158747.12	13	NBL1	protein_coding	1	19640554	19658456	+	4681	2.5526	4.91479	2.69574	406.353	3.84699e-161	7.37033e-160
ENSG00000058085	ENSG00000058085.13	14	LAMC2	protein_coding	1	183186238	183244900	+	3918	3.1719	3.80067	2.41654	383.809	3.56374e-155	6.13474e-154
ENSG00000171243	ENSG00000171243.7	7	SOSTDC1	protein_coding	7	16461481	16530580	-	25928	4.67261	5.17525	4.12055	373.394	2.38823e-152	3.88354e-151
ENSG00000131037	ENSG00000131037.13	14	EPS8L1	protein_coding	19	55072020	55087923	+	54869	2.89893	2.03093	2.80469	348.826	1.69717e-145	2.47727e-144
ENSG00000168077	ENSG00000168077.12	13	SCARA3	protein_coding	8	27633868	27676776	+	51435	2.5945	4.04111	2.48775	327.498	2.52048e-139	3.31282e-138
ENSG00000168703	ENSG00000168703.5	5	WFDC12	protein_coding	20	45123425	45124465	-	128488	2.80197	2.98795	2.42032	320.925	2.22763e-137	2.80607e-136
ENSG00000175315	ENSG00000175315.2	2	CST6	protein_coding	11	66011841	66013505	+	1474	2.72742	2.26869	2.58912	317.696	2.05048e-136	2.5279e-135
ENSG00000114638	ENSG00000114638.6	7	UPK1B	protein_coding	3	119173517	119205153	+	7348	3.55562	4.73185	3.48132	310.881	2.31319e-134	2.72867e-133
ENSG00000157765	ENSG00000157765.10	11	SLC34A2	protein_coding	4	25655301	25678748	+	10568	4.71049	7.49902	4.46308	307.739	2.08252e-133	2.39764e-132
ENSG00000189056	ENSG00000189056.12	13	RELN	protein_coding	7	103471784	103989516	-	5649	2.7168	2.65823	2.15986	306.673	4.39814e-133	5.0196e-132
ENSG00000164825	ENSG00000164825.3	3	DEFB1	protein_coding	8	6870575	6878022	-	1672	2.79652	-2.83174	2.61649	292.305	1.20835e-128	1.26938e-127
ENSG00000152527	ENSG00000152527.12	13	PLEKHH2	protein_coding	2	43637273	43767987	+	130271	2.24621	3.39179	2.73433	282.807	1.20036e-125	1.18447e-124
ENSG00000176842	ENSG00000176842.13	14	IRX5	protein_coding	16	54930862	54934485	+	10265	2.09919	4.09421	2.3728	263.635	1.94042e-119	1.71056e-118
ENSG00000124875	ENSG00000124875.8	9	CXCL6	protein_coding	4	73836497	73849064	+	6372	3.28992	4.72231	3.17357	257.796	1.67164e-117	1.42819e-116
ENSG00000105825	ENSG00000105825.10	11	TFPI2	protein_coding	7	93885397	93890991	-	7980	3.65975	5.26031	2.2027	248.55	2.14601e-114	1.74411e-113
ENSG00000184292	ENSG00000184292.6	6	TACSTD2	protein_coding	1	58575423	58577773	-	4070	3.74999	3.16497	4.32623	245.269	2.80444e-113	2.2295e-112
ENSG00000088992	ENSG00000088992.16	17	TESC	protein_coding	12	117038923	117099479	-	54997	2.38686	3.40351	2.06504	230.85	2.74751e-108	2.00222e-107
ENSG00000175121	ENSG00000175121.10	11	WFDC5	protein_coding	20	45109452	45115172	-	149708	2.59192	3.03007	2.40933	207.942	4.68469e-100	2.93181e-99
ENSG00000124107	ENSG00000124107.5	5	SLPI	protein_coding	20	45252239	45254564	-	6590	4.94062	5.30687	4.18469	189.257	4.79547e-93	2.66994e-92
ENSG00000124134	ENSG00000124134.7	8	KCNS1	protein_coding	20	45092310	45101112	-	3787	2.04238	2.47677	2.23549	180.199	1.52054e-89	7.9527e-89
ENSG00000007062	ENSG00000007062.10	11	PROM1	protein_coding	4	15963076	16084378	-	8842	3.0928	4.39956	3.02093	174.361	2.9915e-87	1.50117e-86
ENSG00000171345	ENSG00000171345.12	13	KRT19	protein_coding	17	41523617	41528308	-	3880	3.12519	5.99754	4.88096	157.636	1.64824e-80	7.3174e-80
ENSG00000175793	ENSG00000175793.11	11	SFN	protein_coding	1	26863138	26864457	+	2810	2.7537	3.78745	2.37336	152.205	2.90136e-78	1.23033e-77
ENSG00000138207	ENSG00000138207.11	13	RBP4	protein_coding	10	93591687	93601744	-	5950	3.62769	7.33077	4.20695	149.614	3.49655e-77	1.45125e-76
ENSG00000142102	ENSG00000142102.14	15	PGGHG	protein_coding	11	289135	296107	+	80162	2.05402	4.28109	3.4067	149.067	5.93038e-77	2.45139e-76
ENSG00000159212	ENSG00000159212.11	12	CLIC6	protein_coding	21	34669389	34718227	+	54102	2.72904	2.94388	3.51636	139.748	5.28322e-73	2.02795e-72
ENSG00000102854	ENSG00000102854.13	15	MSLN	protein_coding	16	760762	768865	+	10232	2.71546	3.9384	3.19418	114.848	5.37476e-62	1.70571e-61
ENSG00000001626	ENSG00000001626.13	14	CFTR	protein_coding	7	117465784	117715971	+	1080	0.195378	-6.24678	0.271247	108.537	4.28556e-59	1.28993e-58
ENSG00000004939	ENSG00000004939.12	13	SLC4A1	protein_coding	17	44248385	44268141	-	6521	-0.365958	-8.10547	-0.27151	3215.35	0	0
ENSG00000035720	ENSG00000035720.6	7	STAP1	protein_coding	4	67558728	67607337	+	26228	-0.195134	-7.623	0.0785836	1720.63	0	0
ENSG00000065320	ENSG00000065320.7	8	NTN1	protein_coding	17	9021542	9244000	+	9423	-0.273482	-5.3323	-0.0370252	3350	0	0
ENSG00000065882	ENSG00000065882.14	15	TBC1D1	protein_coding	4	37891087	38139175	+	23216	-0.117437	-3.14898	-0.191536	2890.29	0	0
ENSG00000072954	ENSG00000072954.5	6	TMEM38A	protein_coding	19	16661127	16690029	+	79041	1.22438	-4.24809	-0.13099	1663.06	0	0
ENSG00000099822	ENSG00000099822.2	2	HCN2	protein_coding	19	589893	617159	+	610	0.362683	-5.24072	-0.497667	1837.2	0	0
ENSG00000100362	ENSG00000100362.11	12	PVALB	protein_coding	22	36800684	36819479	-	5816	-0.0424461	-9.95874	-1.98435	1461.81	0	0
ENSG00000102678	ENSG00000102678.6	6	FGF9	protein_coding	13	21671383	21704498	+	2254	0.622945	-5.08181	0.469228	1716.69	0	0
ENSG00000102755	ENSG00000102755.9	11	FLT1	protein_coding	13	28300344	28495145	-	2321	-4.63529	-2.38755	-1.09782	2367.43	0	0
ENSG00000105929	ENSG00000105929.14	15	ATP6V0A4	protein_coding	7	138706295	138799560	-	50617	1.32683	-7.6719	1.2392	1442.74	0	0
ENSG00000107159	ENSG00000107159.11	12	CA9	protein_coding	9	35673856	35681159	+	768	-5.78537	2.13089	0.636422	2240.77	0	0
ENSG00000107954	ENSG00000107954.9	10	NEURL1	protein_coding	10	103493979	103592552	+	9148	-0.277129	-3.80267	-0.30026	1711.63	0	0
ENSG00000109684	ENSG00000109684.13	14	CLNK	protein_coding	4	10486395	10684865	-	116449	-0.199127	-6.39956	0.0210787	1454.39	0	0
ENSG00000112530	ENSG00000112530.10	11	PACRG	protein_coding	6	162727132	163315492	+	135138	0.961878	-4.34829	0.510213	5678.84	0	0
													1683.74	0	0

## Sheet: p2RCC vs rest (Table SI C)
ENSG	ENSGv	gene_version	SYMBOL	gene_biotype	chr	start	end	strand	ENTREZID	chRCC...ccRCC	chRCC...pRCC_e1	chRCC...pRCC_e2	AveExpr	F	P.Value	adj.P.Val
ENSG00000167749	ENSG00000167749.10	11	KLK4	protein_coding	19	50906352	50910738	-	9622	2.64129	-3.23658	2.30764	2.94243e-17	646.081	1.46869e-214	7.7267e-213
ENSG00000243955	ENSG00000243955.4	5	GSTA1	protein_coding	6	52791664	52803910	-	2938	-3.49515	3.49188	2.32625	-2.95333e-16	559.206	5.16573e-197	1.89983e-195
ENSG00000177508	ENSG00000177508.11	11	IRX3	protein_coding	16	54283304	54286763	-	79191	-2.05032	2.27801	-2.70107	-3.69439e-16	521.722	7.21783e-189	2.25425e-187
ENSG00000148795	ENSG00000148795.5	6	CYP17A1	protein_coding	10	102830531	102837533	-	1586	3.87996	2.58994	3.05139	-1.74366e-17	204.381	9.6741e-99	5.90591e-98
ENSG00000158022	ENSG00000158022.6	6	TRIM63	protein_coding	1	26051304	26068436	-	84676	3.37877	3.52837	2.75807	2.61549e-17	177.565	1.63485e-88	8.37036e-88
ENSG00000004846	ENSG00000004846.15	16	ABCB5	protein_coding	7	20615207	20777038	+	340273	2.19682	2.26818	2.1887	8.17342e-18	148.526	9.99411e-77	4.11217e-76
ENSG00000002726	ENSG00000002726.18	20	AOC1	protein_coding	7	150824627	150861504	+	26	-3.37935	2.27408	-2.66776	8.82729e-17	148.44	1.08637e-76	4.46624e-76
ENSG00000104722	ENSG00000104722.12	13	NEFM	protein_coding	8	24913012	24919098	+	4741	3.22836	3.76342	2.0696	6.15731e-17	145.645	1.63278e-75	6.56852e-75
ENSG00000186198	ENSG00000186198.3	3	SLC51B	protein_coding	15	65045370	65053396	+	123264	3.2377	2.76181	2.62729	-1.25326e-16	129.51	1.46709e-68	5.22188e-68
ENSG00000103154	ENSG00000103154.8	9	NECAB2	protein_coding	16	83968632	84002776	+	54550	2.2984	3.51597	2.62306	2.99692e-17	126.157	4.42843e-67	1.53838e-66
ENSG00000211452	ENSG00000211452.9	10	DIO1	protein_coding	1	53891239	53911086	+	1733	2.90673	3.43008	2.11999	-3.65079e-17	118.499	1.18263e-63	3.86598e-63
ENSG00000157315	ENSG00000157315.4	4	TMED6	protein_coding	16	69343248	69351809	-	146456	2.44898	3.74001	2.61885	-2.77896e-17	114.206	1.0548e-61	3.33186e-61
ENSG00000198074	ENSG00000198074.8	9	AKR1B10	protein_coding	7	134527592	134541408	+	57016	5.37158	6.15833	3.66245	1.27505e-16	114.191	1.07244e-61	3.3865e-61
ENSG00000102575	ENSG00000102575.9	10	ACP5	protein_coding	19	11574660	11579008	-	54	2.63659	4.49098	2.22416	-3.71618e-16	105.742	8.56638e-58	2.51758e-57
ENSG00000171759	ENSG00000171759.7	9	PAH	protein_coding	12	102836885	102958410	-	5053	3.07546	2.81059	4.18674	5.1765e-17	80.2727	1.74704e-45	4.16008e-45
ENSG00000197901	ENSG00000197901.10	11	SLC22A6	protein_coding	11	62936385	62984983	-	9356	2.6915	5.6349	4.23483	-2.37029e-16	78.4005	1.51909e-44	3.56465e-44
ENSG00000103485	ENSG00000103485.16	17	QPRT	protein_coding	16	29679008	29698699	+	23475|105369247	2.92893	3.80058	3.12906	2.24497e-16	76.5448	1.3105e-43	3.02362e-43
ENSG00000158296	ENSG00000158296.12	13	SLC13A3	protein_coding	20	46557823	46684467	-	64849	3.34165	3.21041	2.89107	2.61549e-17	69.3096	6.51341e-40	1.41159e-39
ENSG00000185499	ENSG00000185499.15	16	MUC1	protein_coding	1	155185824	155192916	-	4582	-2.14998	-3.70101	-2.71712	4.26108e-16	68.3854	1.9565e-39	4.20815e-39
ENSG00000148702	ENSG00000148702.13	14	HABP2	protein_coding	10	113550837	113589602	+	3026	2.81724	5.07511	2.97646	2.19048e-16	55.2945	1.57527e-32	3.00631e-32
ENSG00000001626	ENSG00000001626.13	14	CFTR	protein_coding	7	117465784	117715971	+	1080	-0.075869	-6.51802	-0.271247	-6.15731e-17	3215.35	0	0
ENSG00000004939	ENSG00000004939.12	13	SLC4A1	protein_coding	17	44248385	44268141	-	6521	-0.0944485	-7.83396	0.27151	-4.71334e-17	1720.63	0	0
ENSG00000035720	ENSG00000035720.6	7	STAP1	protein_coding	4	67558728	67607337	+	26228	-0.273718	-7.70158	-0.0785836	1.15245e-16	3350	0	0
ENSG00000065320	ENSG00000065320.7	8	NTN1	protein_coding	17	9021542	9244000	+	9423	-0.236457	-5.29528	0.0370252	2.64274e-17	2890.29	0	0
ENSG00000065882	ENSG00000065882.14	15	TBC1D1	protein_coding	4	37891087	38139175	+	23216	0.0740993	-2.95744	0.191536	-2.00521e-16	1663.06	0	0
ENSG00000072954	ENSG00000072954.5	6	TMEM38A	protein_coding	19	16661127	16690029	+	79041	1.35537	-4.1171	0.13099	2.20137e-16	1837.2	0	0
ENSG00000099822	ENSG00000099822.2	2	HCN2	protein_coding	19	589893	617159	+	610	0.86035	-4.74305	0.497667	-9.37219e-17	1461.81	0	0
ENSG00000100362	ENSG00000100362.11	12	PVALB	protein_coding	22	36800684	36819479	-	5816	1.94191	-7.97439	1.98435	-7.62853e-17	1716.69	0	0
ENSG00000102678	ENSG00000102678.6	6	FGF9	protein_coding	13	21671383	21704498	+	2254	0.153717	-5.55104	-0.469228	-8.71832e-18	2367.43	0	0
ENSG00000102755	ENSG00000102755.9	11	FLT1	protein_coding	13	28300344	28495145	-	2321	-3.53747	-1.28973	1.09782	1.0135e-16	1442.74	0	0
ENSG00000105929	ENSG00000105929.14	15	ATP6V0A4	protein_coding	7	138706295	138799560	-	50617	0.0876305	-8.91109	-1.2392	1.96162e-17	2240.77	0	0
ENSG00000107159	ENSG00000107159.11	12	CA9	protein_coding	9	35673856	35681159	+	768	-6.42179	1.49446	-0.636422	-4.1412e-16	1711.63	0	0
ENSG00000107954	ENSG00000107954.9	10	NEURL1	protein_coding	10	103493979	103592552	+	9148	0.0231305	-3.50241	0.30026	-1.19877e-17	1454.39	0	0
ENSG00000109684	ENSG00000109684.13	14	CLNK	protein_coding	4	10486395	10684865	-	116449	-0.220205	-6.42064	-0.0210787	-2.75172e-17	5678.84	0	0
ENSG00000112530	ENSG00000112530.10	11	PACRG	protein_coding	6	162727132	163315492	+	135138	0.451664	-4.8585	-0.510213	-6.81118e-18	1683.74	0	0
ENSG00000112715	ENSG00000112715.19	21	VEGFA	protein_coding	6	43770184	43786487	+	7422	-3.7654	-1.30772	1.34275	2.88794e-16	1787.65	0	0
ENSG00000113739	ENSG00000113739.9	10	STC2	protein_coding	5	173314713	173329503	-	8614	-3.30009	-0.00496054	1.50246	-6.15731e-17	1469.89	0	0
ENSG00000116039	ENSG00000116039.10	11	ATP6V1B1	protein_coding	2	70935882	70965406	+	525	0.40672	-7.95825	-0.175956	1.25326e-16	1636.78	0	0
ENSG00000129521	ENSG00000129521.12	13	EGLN3	protein_coding	14	33924231	34462774	-	112399	-4.3515	0.732225	-0.723415	2.72447e-17	1513.11	0	0
ENSG00000131910	ENSG00000131910.4	4	NR0B2	protein_coding	1	26911489	26913966	-	8431	1.30331	-5.0886	1.26686	3.52819e-17	1503.7	0	0
ENSG00000132677	ENSG00000132677.11	12	RHBG	protein_coding	1	156369212	156385219	+	57127	0.476689	-6.22846	0.285455	6.51149e-17	3441.55	0	0
ENSG00000140519	ENSG00000140519.11	12	RHCG	protein_coding	15	89471398	89496613	-	51458	1.15298	-9.11472	1.22459	2.17958e-18	3366.23	0	0
ENSG00000142449	ENSG00000142449.11	12	FBN3	protein_coding	19	8065402	8149846	-	84467	0.078093	-4.41718	0.0669095	-1.19877e-17	2517.96	0	0
ENSG00000142611	ENSG00000142611.15	16	PRDM16	protein_coding	1	3069168	3438621	+	63976	-0.364811	-3.25311	0.137355	-2.23407e-17	1778.04	0	0
ENSG00000143001	ENSG00000143001.4	4	TMEM61	protein_coding	1	54980792	54992293	+	199964	0.777612	-4.73294	-0.737084	-7.2471e-17	1521.95	0	0
ENSG00000146755	ENSG00000146755.9	10	TRIM50	protein_coding	7	73312539	73328082	-	135892	0.496719	-5.93832	-0.611655	-4.35916e-18	1660.83	0	0
ENSG00000147606	ENSG00000147606.7	8	SLC26A7	protein_coding	8	91209494	91398152	+	115111	0.141848	-6.9785	0.278522	-8.71832e-17	3322.64	0	0
ENSG00000147614	ENSG00000147614.3	3	ATP6V0D2	protein_coding	8	85987323	86154228	+	245972	0.395723	-8.96606	-0.0821468	-9.26321e-17	2252.99	0	0
ENSG00000151418	ENSG00000151418.10	11	ATP6V1G3	protein_coding	1	198523222	198540945	-	127124	-0.0543352	-8.11598	0.0408757	-1.58019e-17	5728.13	0	0
ENSG00000153822	ENSG00000153822.12	13	KCNJ16	protein_coding	17	70053429	70135608	+	3773	0.485182	5.90372	-0.831602	2.46292e-16	1463.51	0	0
ENSG00000125872	ENSG00000125872.7	7	LRRN4	protein_coding	20	6040778	6054049	-	164312	1.47261	3.01241	-2.97823	-4.19569e-17	780.499	1.12546e-238	9.50409e-237

## Sheet: chRCC vs rest (Table SI D)
ENSG	ENSGv	gene_version	SYMBOL	gene_biotype	chr	start	end	strand	ENTREZID	chRCC...ccRCC	chRCC...pRCC_e1	chRCC...pRCC_e2	AveExpr	F	P.Value	adj.P.Val
ENSG00000001626	ENSG00000001626.13	14	CFTR	protein_coding	7	117465784	117715971	+	1080	6.44215	6.24678	6.51802	-6.15731e-17	3215.35	0	0
ENSG00000004939	ENSG00000004939.12	13	SLC4A1	protein_coding	17	44248385	44268141	-	6521	7.73951	8.10547	7.83396	-4.71334e-17	1720.63	0	0
ENSG00000035720	ENSG00000035720.6	7	STAP1	protein_coding	4	67558728	67607337	+	26228	7.42786	7.623	7.70158	1.15245e-16	3350	0	0
ENSG00000065320	ENSG00000065320.7	8	NTN1	protein_coding	17	9021542	9244000	+	9423	5.05882	5.3323	5.29528	2.64274e-17	2890.29	0	0
ENSG00000065882	ENSG00000065882.14	15	TBC1D1	protein_coding	4	37891087	38139175	+	23216	3.03154	3.14898	2.95744	-2.00521e-16	1663.06	0	0
ENSG00000072954	ENSG00000072954.5	6	TMEM38A	protein_coding	19	16661127	16690029	+	79041	5.47247	4.24809	4.1171	2.20137e-16	1837.2	0	0
ENSG00000099822	ENSG00000099822.2	2	HCN2	protein_coding	19	589893	617159	+	610	5.6034	5.24072	4.74305	-9.37219e-17	1461.81	0	0
ENSG00000100362	ENSG00000100362.11	12	PVALB	protein_coding	22	36800684	36819479	-	5816	9.9163	9.95874	7.97439	-7.62853e-17	1716.69	0	0
ENSG00000102678	ENSG00000102678.6	6	FGF9	protein_coding	13	21671383	21704498	+	2254	5.70476	5.08181	5.55104	-8.71832e-18	2367.43	0	0
ENSG00000105929	ENSG00000105929.14	15	ATP6V0A4	protein_coding	7	138706295	138799560	-	50617	8.99873	7.6719	8.91109	1.96162e-17	2240.77	0	0
ENSG00000107954	ENSG00000107954.9	10	NEURL1	protein_coding	10	103493979	103592552	+	9148	3.52554	3.80267	3.50241	-1.19877e-17	1454.39	0	0
ENSG00000109684	ENSG00000109684.13	14	CLNK	protein_coding	4	10486395	10684865	-	116449	6.20043	6.39956	6.42064	-2.75172e-17	5678.84	0	0
ENSG00000112530	ENSG00000112530.10	11	PACRG	protein_coding	6	162727132	163315492	+	135138	5.31017	4.34829	4.8585	-6.81118e-18	1683.74	0	0
ENSG00000116039	ENSG00000116039.10	11	ATP6V1B1	protein_coding	2	70935882	70965406	+	525	8.36497	7.7823	7.95825	1.25326e-16	1636.78	0	0
ENSG00000131910	ENSG00000131910.4	4	NR0B2	protein_coding	1	26911489	26913966	-	8431	6.39191	6.35546	5.0886	3.52819e-17	1503.7	0	0
ENSG00000132677	ENSG00000132677.11	12	RHBG	protein_coding	1	156369212	156385219	+	57127	6.70515	6.51392	6.22846	6.51149e-17	3441.55	0	0
ENSG00000140519	ENSG00000140519.11	12	RHCG	protein_coding	15	89471398	89496613	-	51458	10.2677	10.3393	9.11472	2.17958e-18	3366.23	0	0
ENSG00000142449	ENSG00000142449.11	12	FBN3	protein_coding	19	8065402	8149846	-	84467	4.49528	4.48409	4.41718	-1.19877e-17	2517.96	0	0
ENSG00000142611	ENSG00000142611.15	16	PRDM16	protein_coding	1	3069168	3438621	+	63976	2.8883	3.39047	3.25311	-2.23407e-17	1778.04	0	0
ENSG00000143001	ENSG00000143001.4	4	TMEM61	protein_coding	1	54980792	54992293	+	199964	5.51055	3.99585	4.73294	-7.2471e-17	1521.95	0	0
ENSG00000146755	ENSG00000146755.9	10	TRIM50	protein_coding	7	73312539	73328082	-	135892	6.43504	5.32666	5.93832	-4.35916e-18	1660.83	0	0
ENSG00000147606	ENSG00000147606.7	8	SLC26A7	protein_coding	8	91209494	91398152	+	115111	7.12035	7.25702	6.9785	-8.71832e-17	3322.64	0	0
ENSG00000147614	ENSG00000147614.3	3	ATP6V0D2	protein_coding	8	85987323	86154228	+	245972	9.36179	8.88392	8.96606	-9.26321e-17	2252.99	0	0
ENSG00000151418	ENSG00000151418.10	11	ATP6V1G3	protein_coding	1	198523222	198540945	-	127124	8.06164	8.15685	8.11598	-1.58019e-17	5728.13	0	0
ENSG00000153822	ENSG00000153822.12	13	KCNJ16	protein_coding	17	70053429	70135608	+	3773	-5.41853	-6.73532	-5.90372	2.46292e-16	1463.51	0	0
ENSG00000156284	ENSG00000156284.5	5	CLDN8	protein_coding	21	30214006	30216073	-	9073	7.64648	7.69824	7.71031	-1.90713e-18	1925.22	0	0
ENSG00000158089	ENSG00000158089.13	14	GALNT14	protein_coding	2	30910467	31155202	-	79623	-6.04225	-5.96921	-5.40085	2.15778e-16	1609.46	0	0
ENSG00000162399	ENSG00000162399.6	6	BSND	protein_coding	1	54998933	55010883	+	7809	6.56303	6.61018	6.48331	-7.13812e-17	9957.71	0	0
ENSG00000165621	ENSG00000165621.7	8	OXGR1	protein_coding	13	96985719	96994730	-	27199	4.30731	4.42906	4.35852	3.3511e-17	2502.86	0	0
ENSG00000167748	ENSG00000167748.9	10	KLK1	protein_coding	19	50819148	50823787	-	3816	8.75036	8.68712	7.26957	-5.44895e-18	1667.05	0	0
ENSG00000168269	ENSG00000168269.8	8	FOXI1	protein_coding	5	170105897	170109725	+	2299	9.33584	9.42753	9.38088	-1.11703e-16	11645.5	0	0
ENSG00000168785	ENSG00000168785.6	7	TSPAN5	protein_coding	4	98470367	98658629	-	10098	3.84733	5.65249	5.28472	-1.09524e-16	1514.1	0	0
ENSG00000168878	ENSG00000168878.15	16	SFTPB	protein_coding	2	85657314	85668741	-	6439	5.14314	5.09788	5.17266	5.27186e-17	1738.87	0	0
ENSG00000168907	ENSG00000168907.12	13	PLA2G4F	protein_coding	15	42139034	42156636	-	255189	6.46831	6.37348	6.19441	-5.99384e-18	4923.27	0	0
ENSG00000173253	ENSG00000173253.13	15	DMRT2	protein_coding	9	1049858	1057552	+	10655	7.96125	8.05181	7.99594	5.38084e-17	9454.14	0	0
ENSG00000174562	ENSG00000174562.12	13	KLK15	protein_coding	19	50825289	50837213	-	55554	5.19864	5.21248	4.61028	-2.04336e-17	1798.85	0	0
ENSG00000184012	ENSG00000184012.10	11	TMPRSS2	protein_coding	21	41464551	41531116	-	7113	6.51734	5.70004	5.61293	4.1412e-17	1718.98	0	0
ENSG00000184908	ENSG00000184908.16	17	CLCNKB	protein_coding	1	16043736	16057308	+	1188	8.38814	6.79076	7.96108	-1.23146e-16	1657.09	0	0
ENSG00000185133	ENSG00000185133.12	13	INPP5J	protein_coding	22	31122731	31134696	+	27124	7.25642	6.21809	6.50722	1.18242e-16	3227.78	0	0
ENSG00000185352	ENSG00000185352.8	8	HS6ST3	protein_coding	13	96090839	96839562	+	266722	4.44833	4.65609	4.36662	4.56349e-17	1747.84	0	0
ENSG00000186766	ENSG00000186766.7	7	FOXI2	protein_coding	10	127737235	127741186	+	399823	5.39495	5.65644	5.65253	-3.26937e-18	1503.89	0	0
ENSG00000187715	ENSG00000187715.12	13	KBTBD12	protein_coding	3	127915232	127987671	+	166348	3.30991	3.27196	3.30986	8.85454e-18	1953.36	0	0
ENSG00000188175	ENSG00000188175.8	9	HEPACAM2	protein_coding	7	93188586	93226524	-	253012	7.96764	8.0168	8.00293	3.81426e-18	7538.16	0	0
ENSG00000197943	ENSG00000197943.8	9	PLCG2	protein_coding	16	81739097	81962693	+	5336	4.66236	5.78103	5.04703	-1.90168e-16	2050.7	0	0
ENSG00000214128	ENSG00000214128.9	10	TMEM213	protein_coding	7	138797952	138838101	+	155006	8.83921	7.94236	8.87106	6.04833e-17	2491.59	0	0
ENSG00000241233	ENSG00000241233.2	3	KRTAP5-8	protein_coding	11	71538025	71539207	+	57830	4.80064	4.88246	4.89116	1.52571e-17	2409.36	0	0
ENSG00000263155	ENSG00000263155.4	5	MYZAP	protein_coding	15	57591941	57685364	+	100820829	4.84763	5.09805	5.01045	-2.1932e-17	2908.14	0	0
ENSG00000185274	ENSG00000185274.10	11	WBSCR17	protein_coding	7	71132169	71713600	+	64409	6.56406	6.8151	6.61516	1.96162e-17	1424.85	5.92878775009496e-323	2.12102381759647e-320
ENSG00000146021	ENSG00000146021.13	14	KLHL3	protein_coding	5	137617500	137736090	-	26249	3.82047	3.97629	4.06832	-6.26629e-18	1420.33	1.77863632502849e-322	6.24943635424593e-320
ENSG00000101638	ENSG00000101638.12	13	ST8SIA5	protein_coding	18	46667821	46759257	-	29906	2.87798	2.96495	2.69545	9.12699e-18	1401.16	1.79395236004957e-320	6.19259904234835e-318
ENSG00000157703	ENSG00000157703.14	15	SVOPL	protein_coding	7	138594285	138701352	-	136306	2.26574	2.19119	2.23438	9.39943e-18	1397.98	3.87989751679131e-320	1.31622200665677e-317
